# Supplementary material
Source: publisher figshare collection journal article supplement (https://acs.figshare.com/ndownloader/files/4383499)
Supplement: Supplementary file 1 [file 4383499]

  
data_8469 
  
_audit_creation_method            SHELXL-97 
_chemical_name_systematic 
; 
 ? 
; 
_chemical_name_common             ? 
_chemical_melting_point           ? 
_chemical_formula_moiety          ? 
_chemical_formula_sum 
 'C40 H24' 
_chemical_formula_weight          504.59 
  
loop_ 
 _atom_type_symbol 
 _atom_type_description 
 _atom_type_scat_dispersion_real 
 _atom_type_scat_dispersion_imag 
 _atom_type_scat_source 
 'C'  'C'   0.0033   0.0016 
 'International Tables Vol C Tables 4.2.6.8 and 6.1.1.4' 
 'H'  'H'   0.0000   0.0000 
 'International Tables Vol C Tables 4.2.6.8 and 6.1.1.4' 
  
_symmetry_cell_setting            Monoclinic 
_symmetry_space_group_name_H-M    C2/c 
  
loop_ 
 _symmetry_equiv_pos_as_xyz 
 'x, y, z' 
 '-x, y, -z+1/2' 
 'x+1/2, y+1/2, z' 
 '-x+1/2, y+1/2, -z+1/2' 
 '-x, -y, -z' 
 'x, -y, z-1/2' 
 '-x+1/2, -y+1/2, -z' 
 'x+1/2, -y+1/2, z-1/2' 
  
_cell_length_a                    27.083(3) 
_cell_length_b                    5.8323(7) 
_cell_length_c                    34.230(4) 
_cell_angle_alpha                 90.00 
_cell_angle_beta                  111.812(3) 
_cell_angle_gamma                 90.00 
_cell_volume                      5019.7(11) 
_cell_formula_units_Z             8 
_cell_measurement_temperature     223(2) 
_cell_measurement_reflns_used     2241 
_cell_measurement_theta_min       2.47 
_cell_measurement_theta_max       26.57 
  
_exptl_crystal_description        Plate 
_exptl_crystal_colour             Yellow 
_exptl_crystal_size_max           0.40 
_exptl_crystal_size_mid           0.10 
_exptl_crystal_size_min           0.04 
_exptl_crystal_density_meas       Not 
_exptl_crystal_density_diffrn     1.335 
_exptl_crystal_density_method     'not measured' 
_exptl_crystal_F_000              2112 
_exptl_absorpt_coefficient_mu     0.076 
_exptl_absorpt_correction_type    Empirical 
_exptl_absorpt_correction_T_min   0.9704 
_exptl_absorpt_correction_T_max   0.9970 
_exptl_absorpt_process_details    'Sadabs, (Sheldrick 2001)'
  
_exptl_special_details 
; 
 ? 
; 
  
_diffrn_ambient_temperature       223(2) 
_diffrn_radiation_wavelength      0.71073 
_diffrn_radiation_type            MoK\a 
_diffrn_radiation_source          'fine-focus sealed tube' 
_diffrn_radiation_monochromator   graphite 
_diffrn_measurement_device_type   'CCD area detector' 
_diffrn_measurement_method        'phi and omega scans' 
_diffrn_detector_area_resol_mean  ? 
_diffrn_standards_number          ? 
_diffrn_standards_interval_count  ? 
_diffrn_standards_interval_time   ? 
_diffrn_standards_decay_%         ? 
_diffrn_reflns_number             15105 
_diffrn_reflns_av_R_equivalents   0.0548 
_diffrn_reflns_av_sigmaI/netI     0.0604 
_diffrn_reflns_limit_h_min        -33 
_diffrn_reflns_limit_h_max        31 
_diffrn_reflns_limit_k_min        -7 
_diffrn_reflns_limit_k_max        7 
_diffrn_reflns_limit_l_min        -29 
_diffrn_reflns_limit_l_max        42 
_diffrn_reflns_theta_min          1.62 
_diffrn_reflns_theta_max          26.00 
_reflns_number_total              4935 
_reflns_number_gt                 3617 
_reflns_threshold_expression      >2sigma(I) 
  
_computing_data_collection        'Bruker SMART' 
_computing_cell_refinement        'Bruker SMART' 
_computing_data_reduction         'Bruker SAINT' 
_computing_structure_solution     'SHELXS-97 (Sheldrick, 1990)' 
_computing_structure_refinement   'SHELXL-97 (Sheldrick, 1997)' 
_computing_molecular_graphics     'Bruker SHELXTL' 
_computing_publication_material   'Bruker SHELXTL' 
  
_refine_special_details 
; 
 Refinement of F^2^ against ALL reflections.  The weighted R-factor wR and 
 goodness of fit S are based on F^2^, conventional R-factors R are based 
 on F, with F set to zero for negative F^2^. The threshold expression of 
 F^2^ > 2sigma(F^2^) is used only for calculating R-factors(gt) etc. and is 
 not relevant to the choice of reflections for refinement.  R-factors based 
 on F^2^ are statistically about twice as large as those based on F, and R- 
 factors based on ALL data will be even larger. 
; 
  
_refine_ls_structure_factor_coef  Fsqd 
_refine_ls_matrix_type            full 
_refine_ls_weighting_scheme       calc 
_refine_ls_weighting_details 
 'calc w=1/[\s^2^(Fo^2^)+(0.0587P)^2^+7.1060P] where P=(Fo^2^+2Fc^2^)/3' 
_atom_sites_solution_primary      direct 
_atom_sites_solution_secondary    difmap 
_atom_sites_solution_hydrogens    geom 
_refine_ls_hydrogen_treatment     mixed 
_refine_ls_extinction_method      none 
_refine_ls_extinction_coef        ? 
_refine_ls_number_reflns          4935 
_refine_ls_number_parameters      361 
_refine_ls_number_restraints      0 
_refine_ls_R_factor_all           0.1214 
_refine_ls_R_factor_gt            0.0898 
_refine_ls_wR_factor_ref          0.2063 
_refine_ls_wR_factor_gt           0.1906 
_refine_ls_goodness_of_fit_ref    1.171 
_refine_ls_restrained_S_all       1.171 
_refine_ls_shift/su_max           0.001 
_refine_ls_shift/su_mean          0.000 
  
loop_ 
 _atom_site_label 
 _atom_site_type_symbol 
 _atom_site_fract_x 
 _atom_site_fract_y 
 _atom_site_fract_z 
 _atom_site_U_iso_or_equiv 
 _atom_site_adp_type 
 _atom_site_occupancy 
 _atom_site_symmetry_multiplicity 
 _atom_site_calc_flag 
 _atom_site_refinement_flags 
 _atom_site_disorder_assembly 
 _atom_site_disorder_group 
C1 C 0.40185(14) 0.4870(5) 0.15615(10) 0.0488(8) Uani 1 1 d . . . 
H1 H 0.4103 0.5721 0.1362 0.059 Uiso 1 1 calc R . . 
C2 C 0.43978(14) 0.3512(5) 0.18393(11) 0.0522(9) Uani 1 1 d . . . 
H2 H 0.4742 0.3460 0.1833 0.063 Uiso 1 1 calc R . . 
C3 C 0.42785(15) 0.2207(6) 0.21313(10) 0.0550(9) Uani 1 1 d . . . 
H3 H 0.4541 0.1268 0.2321 0.066 Uiso 1 1 calc R . . 
C4 C 0.37814(15) 0.2286(6) 0.21437(10) 0.0542(9) Uani 1 1 d . . . 
H4 H 0.3704 0.1389 0.2342 0.065 Uiso 1 1 calc R . . 
C5 C 0.33817(14) 0.3690(5) 0.18644(10) 0.0463(8) Uani 1 1 d . . . 
C6 C 0.34995(13) 0.5021(5) 0.15689(9) 0.0434(8) Uani 1 1 d . . . 
C7 C 0.31020(14) 0.6517(5) 0.12863(9) 0.0454(8) Uani 1 1 d . . . 
C8 C 0.26068(13) 0.6792(5) 0.13253(9) 0.0432(8) Uani 1 1 d . . . 
C9 C 0.24719(13) 0.5347(5) 0.16122(9) 0.0427(8) Uani 1 1 d . . . 
C10 C 0.28524(14) 0.3784(5) 0.18722(9) 0.0452(8) Uani 1 1 d . . . 
C11 C 0.27066(15) 0.2276(6) 0.21302(10) 0.0563(9) Uani 1 1 d . . . 
H11 H 0.2959 0.1230 0.2300 0.068 Uiso 1 1 calc R . . 
C12 C 0.22138(15) 0.2285(6) 0.21413(10) 0.0562(9) Uani 1 1 d . . . 
H12 H 0.2131 0.1255 0.2319 0.067 Uiso 1 1 calc R . . 
C13 C 0.18200(14) 0.3819(5) 0.18899(9) 0.0463(8) Uani 1 1 d . . . 
C14 C 0.19421(13) 0.5371(5) 0.16232(8) 0.0412(8) Uani 1 1 d . . . 
C15 C 0.15346(14) 0.6845(5) 0.13454(9) 0.0427(8) Uani 1 1 d . . . 
C16 C 0.10082(14) 0.6578(5) 0.13208(9) 0.0447(8) Uani 1 1 d . . . 
C17 C 0.08881(14) 0.5067(5) 0.16061(9) 0.0460(8) Uani 1 1 d . . . 
C18 C 0.12905(14) 0.3740(5) 0.18958(9) 0.0463(8) Uani 1 1 d . . . 
C19 C 0.11602(16) 0.2346(6) 0.21817(10) 0.0548(9) Uani 1 1 d . . . 
H19 H 0.1428 0.1466 0.2379 0.066 Uiso 1 1 calc R . . 
C20 C 0.06531(16) 0.2245(6) 0.21782(11) 0.0561(9) Uani 1 1 d . . . 
H20 H 0.0577 0.1318 0.2373 0.067 Uiso 1 1 calc R . . 
C21 C 0.02500(15) 0.3530(6) 0.18827(11) 0.0533(9) Uani 1 1 d . . . 
H21 H -0.0099 0.3465 0.1878 0.064 Uiso 1 1 calc R . . 
C22 C 0.03636(14) 0.4874(5) 0.16017(10) 0.0487(8) Uani 1 1 d . . . 
H22 H 0.0087 0.5695 0.1399 0.058 Uiso 1 1 calc R . . 
C23 C 0.32643(12) 0.7589(5) 0.09556(10) 0.0440(8) Uani 1 1 d . . . 
C24 C 0.36078(13) 0.9465(5) 0.10496(11) 0.0510(9) Uani 1 1 d . . . 
H24 H 0.3727 1.0107 0.1321 0.061 Uiso 1 1 calc R . . 
C25 C 0.37742(14) 1.0387(6) 0.07487(12) 0.0608(10) Uani 1 1 d . . . 
H25 H 0.4003 1.1663 0.0815 0.073 Uiso 1 1 calc R . . 
C26 C 0.36068(15) 0.9447(7) 0.03522(12) 0.0666(11) Uani 1 1 d . . . 
H26 H 0.3719 1.0080 0.0147 0.080 Uiso 1 1 calc R . . 
C27 C 0.32727(16) 0.7568(8) 0.02579(12) 0.0705(11) Uani 1 1 d . . . 
H27 H 0.3158 0.6919 -0.0013 0.085 Uiso 1 1 calc R . . 
C28 C 0.31078(15) 0.6647(6) 0.05572(11) 0.0592(10) Uani 1 1 d . . . 
H28 H 0.2885 0.5354 0.0491 0.071 Uiso 1 1 calc R . . 
C29 C 0.22154(13) 0.8556(5) 0.10909(9) 0.0439(8) Uani 1 1 d . . . 
C30 C 0.23436(16) 1.0362(6) 0.08771(13) 0.0686(11) Uani 1 1 d . . . 
H30 H 0.2690 1.0407 0.0875 0.082 Uiso 1 1 calc R . . 
C31 C 0.20002(15) 1.2063(6) 0.06713(11) 0.0536(9) Uani 1 1 d . . . 
H31 H 0.2102 1.3176 0.0517 0.064 Uiso 1 1 calc R . . 
C32 C 0.15143(15) 1.2126(6) 0.06921(11) 0.0573(10) Uani 1 1 d . . . 
H32 H 0.1272 1.3292 0.0555 0.069 Uiso 1 1 calc R . . 
C33 C 0.13777(16) 1.0471(7) 0.09150(13) 0.0710(12) Uani 1 1 d . . . 
H33 H 0.1046 1.0598 0.0943 0.085 Uiso 1 1 calc R . . 
C34 C 0.17007(14) 0.8593(5) 0.11051(9) 0.0448(8) Uani 1 1 d . . . 
C35 C 0.05320(14) 0.7691(5) 0.09958(9) 0.0465(8) Uani 1 1 d . . . 
C36 C 0.03233(17) 0.6802(7) 0.05991(12) 0.0775(13) Uani 1 1 d . . . 
H36 H 0.0489 0.5543 0.0527 0.093 Uiso 1 1 calc R . . 
C37 C -0.01312(19) 0.7743(8) 0.03015(13) 0.0941(17) Uani 1 1 d . . . 
H37 H -0.0268 0.7123 0.0029 0.113 Uiso 1 1 calc R . . 
C38 C -0.03818(16) 0.9555(7) 0.03995(12) 0.0693(11) Uani 1 1 d . . . 
H38 H -0.0691 1.0181 0.0197 0.083 Uiso 1 1 calc R . . 
C39 C -0.01783(15) 1.0450(6) 0.07964(11) 0.0559(9) Uani 1 1 d . . . 
H39 H -0.0346 1.1705 0.0868 0.067 Uiso 1 1 calc R . . 
C40 C 0.02738(14) 0.9511(5) 0.10931(10) 0.0485(8) Uani 1 1 d . . . 
H40 H 0.0408 1.0124 0.1367 0.058 Uiso 1 1 calc R . . 
  
loop_ 
 _atom_site_aniso_label 
 _atom_site_aniso_U_11 
 _atom_site_aniso_U_22 
 _atom_site_aniso_U_33 
 _atom_site_aniso_U_23 
 _atom_site_aniso_U_13 
 _atom_site_aniso_U_12 
C1 0.055(2) 0.0319(17) 0.0496(19) 0.0001(14) 0.0084(16) -0.0066(15) 
C2 0.051(2) 0.0382(18) 0.054(2) -0.0019(16) 0.0044(17) -0.0001(16) 
C3 0.057(2) 0.0445(19) 0.0471(19) 0.0046(16) 0.0001(17) 0.0075(18) 
C4 0.064(2) 0.0459(19) 0.0439(19) 0.0085(16) 0.0092(17) 0.0020(18) 
C5 0.058(2) 0.0342(16) 0.0363(16) -0.0003(13) 0.0050(15) 0.0019(15) 
C6 0.051(2) 0.0298(15) 0.0387(17) -0.0062(13) 0.0046(15) -0.0070(14) 
C7 0.054(2) 0.0290(15) 0.0378(17) -0.0026(13) -0.0009(15) -0.0073(15) 
C8 0.052(2) 0.0285(15) 0.0358(16) -0.0048(13) 0.0011(15) -0.0043(14) 
C9 0.055(2) 0.0286(15) 0.0325(16) -0.0069(12) 0.0029(14) -0.0026(15) 
C10 0.058(2) 0.0349(16) 0.0331(16) -0.0030(13) 0.0059(15) -0.0017(15) 
C11 0.064(2) 0.053(2) 0.0424(19) 0.0143(16) 0.0088(17) 0.0087(19) 
C12 0.069(3) 0.049(2) 0.0440(19) 0.0130(16) 0.0127(18) 0.0005(19) 
C13 0.062(2) 0.0368(17) 0.0282(15) -0.0027(13) 0.0031(15) -0.0041(16) 
C14 0.056(2) 0.0310(15) 0.0250(14) -0.0074(12) 0.0018(14) -0.0023(14) 
C15 0.060(2) 0.0330(16) 0.0275(15) -0.0047(12) 0.0078(14) -0.0034(15) 
C16 0.059(2) 0.0348(16) 0.0318(16) -0.0071(13) 0.0065(15) -0.0004(15) 
C17 0.063(2) 0.0324(16) 0.0343(16) -0.0103(13) 0.0090(15) -0.0041(15) 
C18 0.060(2) 0.0382(17) 0.0324(16) -0.0065(13) 0.0075(15) -0.0061(16) 
C19 0.070(3) 0.0463(19) 0.0395(18) 0.0037(15) 0.0105(17) -0.0064(18) 
C20 0.075(3) 0.0426(19) 0.050(2) -0.0016(16) 0.0226(19) -0.0111(19) 
C21 0.064(2) 0.0359(18) 0.058(2) -0.0092(16) 0.0210(19) -0.0077(17) 
C22 0.057(2) 0.0336(17) 0.0511(19) -0.0086(15) 0.0144(17) -0.0049(16) 
C23 0.0435(18) 0.0329(16) 0.0414(17) 0.0042(13) -0.0005(14) -0.0016(14) 
C24 0.052(2) 0.0350(17) 0.053(2) 0.0044(15) 0.0051(16) -0.0056(16) 
C25 0.053(2) 0.047(2) 0.066(2) 0.0174(18) 0.0023(19) -0.0099(18) 
C26 0.058(2) 0.074(3) 0.058(2) 0.031(2) 0.0098(19) 0.001(2) 
C27 0.078(3) 0.079(3) 0.0397(19) 0.007(2) 0.0058(19) -0.009(2) 
C28 0.064(2) 0.052(2) 0.047(2) 0.0027(17) 0.0035(18) -0.0156(18) 
C29 0.052(2) 0.0322(16) 0.0348(16) -0.0011(13) 0.0014(15) -0.0039(15) 
C30 0.053(2) 0.050(2) 0.096(3) 0.028(2) 0.019(2) 0.0069(18) 
C31 0.059(2) 0.0380(18) 0.058(2) 0.0141(16) 0.0151(18) 0.0007(17) 
C32 0.056(2) 0.052(2) 0.055(2) 0.0211(17) 0.0109(18) 0.0103(18) 
C33 0.065(3) 0.071(3) 0.080(3) 0.037(2) 0.030(2) 0.017(2) 
C34 0.056(2) 0.0385(17) 0.0312(16) 0.0006(13) 0.0065(15) 0.0011(16) 
C35 0.058(2) 0.0402(17) 0.0368(16) -0.0049(14) 0.0120(15) -0.0009(16) 
C36 0.080(3) 0.077(3) 0.054(2) -0.022(2) 0.001(2) 0.031(2) 
C37 0.099(4) 0.100(4) 0.049(2) -0.027(2) -0.012(2) 0.034(3) 
C38 0.063(3) 0.073(3) 0.056(2) 0.003(2) 0.0026(19) 0.017(2) 
C39 0.070(3) 0.0406(18) 0.055(2) 0.0070(17) 0.0211(19) 0.0097(18) 
C40 0.067(2) 0.0355(17) 0.0382(17) -0.0010(14) 0.0137(16) 0.0001(17) 
  
_geom_special_details 
; 
 All esds (except the esd in the dihedral angle between two l.s. planes) 
 are estimated using the full covariance matrix.  The cell esds are taken 
 into account individually in the estimation of esds in distances, angles 
 and torsion angles; correlations between esds in cell parameters are only 
 used when they are defined by crystal symmetry.  An approximate (isotropic) 
 treatment of cell esds is used for estimating esds involving l.s. planes. 
; 
  
loop_ 
 _geom_bond_atom_site_label_1 
 _geom_bond_atom_site_label_2 
 _geom_bond_distance 
 _geom_bond_site_symmetry_2 
 _geom_bond_publ_flag 
C1 C2 1.364(4) . ? 
C1 C6 1.418(5) . ? 
C2 C3 1.386(5) . ? 
C3 C4 1.363(5) . ? 
C4 C5 1.410(4) . ? 
C5 C6 1.402(4) . ? 
C5 C10 1.445(5) . ? 
C6 C7 1.443(4) . ? 
C7 C8 1.405(5) . ? 
C7 C23 1.495(5) . ? 
C8 C9 1.440(4) . ? 
C8 C29 1.481(4) . ? 
C9 C10 1.415(4) . ? 
C9 C14 1.450(5) . ? 
C10 C11 1.403(5) . ? 
C11 C12 1.349(5) . ? 
C12 C13 1.413(5) . ? 
C13 C14 1.410(4) . ? 
C13 C18 1.442(5) . ? 
C14 C15 1.442(4) . ? 
C15 C16 1.405(5) . ? 
C15 C34 1.481(4) . ? 
C16 C17 1.439(4) . ? 
C16 C35 1.502(4) . ? 
C17 C18 1.402(4) . ? 
C17 C22 1.420(5) . ? 
C18 C19 1.414(4) . ? 
C19 C20 1.370(5) . ? 
C20 C21 1.398(5) . ? 
C21 C22 1.362(5) . ? 
C23 C28 1.383(4) . ? 
C23 C24 1.394(4) . ? 
C24 C25 1.378(5) . ? 
C25 C26 1.375(5) . ? 
C26 C27 1.381(6) . ? 
C27 C28 1.370(5) . ? 
C29 C30 1.398(5) . ? 
C29 C34 1.413(5) . ? 
C30 C31 1.363(5) . ? 
C31 C32 1.345(5) . ? 
C32 C33 1.364(5) . ? 
C33 C34 1.402(5) . ? 
C35 C36 1.364(5) . ? 
C35 C40 1.378(4) . ? 
C36 C37 1.386(5) . ? 
C37 C38 1.364(6) . ? 
C38 C39 1.366(5) . ? 
C39 C40 1.381(5) . ? 
  
loop_ 
 _geom_angle_atom_site_label_1 
 _geom_angle_atom_site_label_2 
 _geom_angle_atom_site_label_3 
 _geom_angle 
 _geom_angle_site_symmetry_1 
 _geom_angle_site_symmetry_3 
 _geom_angle_publ_flag 
C2 C1 C6 121.2(3) . . ? 
C1 C2 C3 120.3(3) . . ? 
C4 C3 C2 120.1(3) . . ? 
C3 C4 C5 121.1(3) . . ? 
C6 C5 C4 119.2(3) . . ? 
C6 C5 C10 119.0(3) . . ? 
C4 C5 C10 121.8(3) . . ? 
C5 C6 C1 118.1(3) . . ? 
C5 C6 C7 120.4(3) . . ? 
C1 C6 C7 121.5(3) . . ? 
C8 C7 C6 120.4(3) . . ? 
C8 C7 C23 125.7(3) . . ? 
C6 C7 C23 113.9(3) . . ? 
C7 C8 C9 119.4(3) . . ? 
C7 C8 C29 123.0(3) . . ? 
C9 C8 C29 117.6(3) . . ? 
C10 C9 C8 119.7(3) . . ? 
C10 C9 C14 119.1(3) . . ? 
C8 C9 C14 121.1(3) . . ? 
C11 C10 C9 119.4(3) . . ? 
C11 C10 C5 120.1(3) . . ? 
C9 C10 C5 120.6(3) . . ? 
C12 C11 C10 121.9(3) . . ? 
C11 C12 C13 121.1(3) . . ? 
C14 C13 C12 119.7(3) . . ? 
C14 C13 C18 120.2(3) . . ? 
C12 C13 C18 120.0(3) . . ? 
C13 C14 C15 120.2(3) . . ? 
C13 C14 C9 118.9(3) . . ? 
C15 C14 C9 120.7(3) . . ? 
C16 C15 C14 119.0(3) . . ? 
C16 C15 C34 123.6(3) . . ? 
C14 C15 C34 117.4(3) . . ? 
C15 C16 C17 120.5(3) . . ? 
C15 C16 C35 124.7(3) . . ? 
C17 C16 C35 114.8(3) . . ? 
C18 C17 C22 118.4(3) . . ? 
C18 C17 C16 120.4(3) . . ? 
C22 C17 C16 121.2(3) . . ? 
C17 C18 C19 118.6(3) . . ? 
C17 C18 C13 119.2(3) . . ? 
C19 C18 C13 122.2(3) . . ? 
C20 C19 C18 121.7(3) . . ? 
C19 C20 C21 119.6(3) . . ? 
C22 C21 C20 119.9(4) . . ? 
C21 C22 C17 121.7(3) . . ? 
C28 C23 C24 118.2(3) . . ? 
C28 C23 C7 120.8(3) . . ? 
C24 C23 C7 120.8(3) . . ? 
C25 C24 C23 120.6(3) . . ? 
C26 C25 C24 120.2(3) . . ? 
C25 C26 C27 119.6(4) . . ? 
C28 C27 C26 120.3(4) . . ? 
C27 C28 C23 121.0(3) . . ? 
C30 C29 C34 116.5(3) . . ? 
C30 C29 C8 122.7(3) . . ? 
C34 C29 C8 120.6(3) . . ? 
C31 C30 C29 124.4(4) . . ? 
C32 C31 C30 119.0(3) . . ? 
C31 C32 C33 119.0(3) . . ? 
C32 C33 C34 124.1(4) . . ? 
C33 C34 C29 116.7(3) . . ? 
C33 C34 C15 122.0(3) . . ? 
C29 C34 C15 121.1(3) . . ? 
C36 C35 C40 118.3(3) . . ? 
C36 C35 C16 119.8(3) . . ? 
C40 C35 C16 121.8(3) . . ? 
C35 C36 C37 120.5(4) . . ? 
C38 C37 C36 120.9(4) . . ? 
C37 C38 C39 119.2(4) . . ? 
C38 C39 C40 120.0(3) . . ? 
C35 C40 C39 121.2(3) . . ? 
  
_diffrn_measured_fraction_theta_max    0.999 
_diffrn_reflns_theta_full              26.00 
_diffrn_measured_fraction_theta_full   0.999 
_refine_diff_density_max    0.368 
_refine_diff_density_min   -0.267 
_refine_diff_density_rms    0.046 
